# Supplementary material
Source: PubMed Central journal article supplement (PMC3710785)
Supplement: 1300624110_pnas.201300624SI.pdf [file 1300624110_pnas.201300624SI.pdf]

# Supporting Information

Jeiranian et al. 10.1073/pnas.1300624110

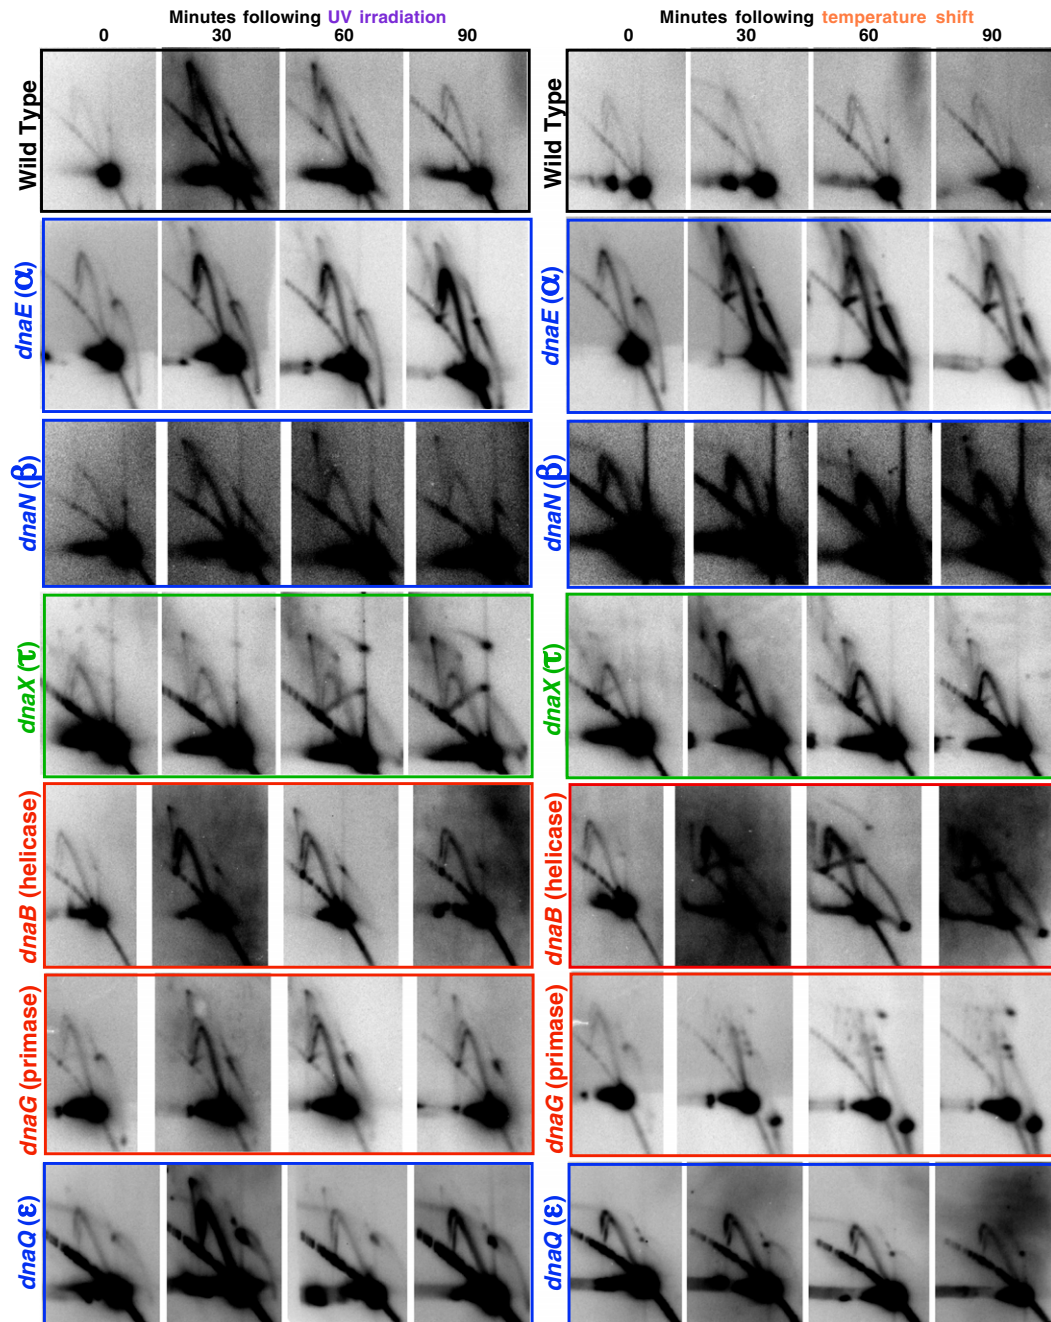

Fig. S1. A comparison of the replication intermediates observed by 2D agarose gel analysis following UV irradiation or temperature shift over time is shown for wild type and each of the temperature-sensitive replication mutants used in this study. Strains containing plasmid pBR322 were UV-irradiated with 50 J/m<sup>2</sup> or filtered and placed in prewarmed media at 42 °C. Genomic and plasmid DNA was then purified, digested with PvuII, and analyzed by 2D agarose gel analysis at 0, 30, 60, and 90 min following UV-irradiation or temperature shift, as indicated.



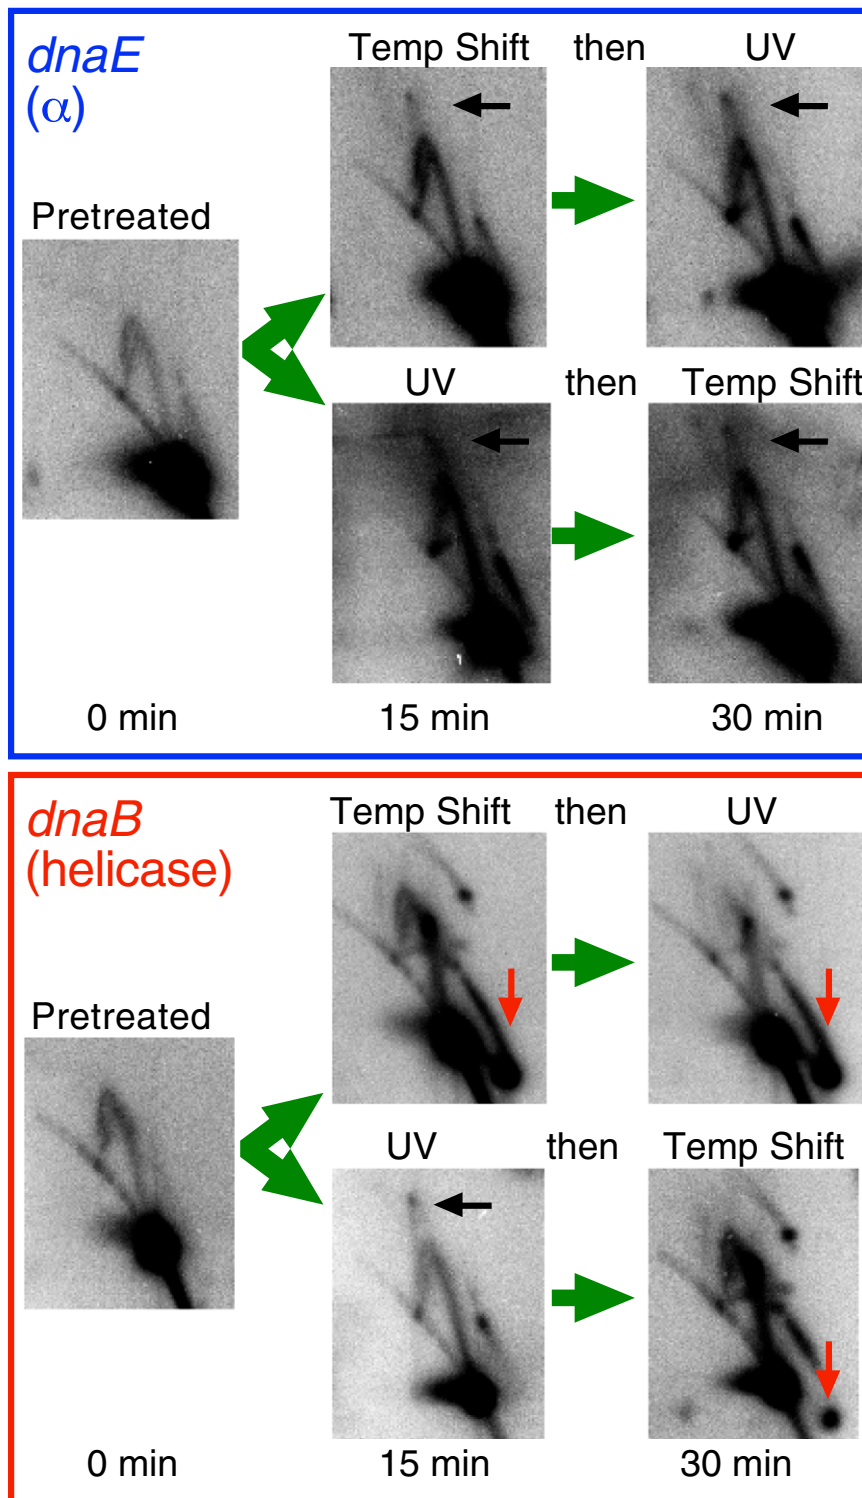

**Fig. S3.** Replication fork processing induced by polymerase inactivation or UV-induced damage remains unchanged when compounded by the second form of challenge, consistent with the idea that the UV-induced intermediates are similar to those that occur when the polymerase dissociates. In contrast, inactivation of the helicase prevents the formation of UV-induced processing intermediates and also destroys any UV-induced processing intermediates that are present at the time of inactivation, consistent with the idea that the fork loses integrity upon helicase inactivation and that UV-induced processing requires the integrity of the fork to remain intact. Strains containing plasmid pBR322 were split and then either UV-irradiated with 50 J/m<sup>2</sup> or shifted to 42 °C and incubated for 15 min. At this time, the UV irradiated half of the culture was shifted to 42 °C, whereas the 42 °C half of the culture was UV irradiated with 50 J/m<sup>2</sup>. Incubation was then continued for another 15 min. Aliquots of the culture were taken before treatment began, at 15 min, and at 30 min following the initial treatment. The genomic and plasmid DNA was purified, digested with PvuII, and analyzed by 2D agarose gel analysis as described in Fig. 2.

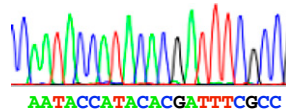

wild type *dnaE* sequence: 5' AATACCATACACGATTTCGCC 3' TS  
 3' TTATGGTATGTCTAAAGCGG 5' NTS  
 C- I G Y V I E G -N Protein

**Fig. S4.** Strain KH1366 retains a wild type copy of the *dnaE* gene. The lack of phenotype in KH1366 (*dnaQ49ts*) is not due to the acquisition of an *spq-2* suppressor mutation. These compensatory mutations in DNA Polymerase III alpha, which convert valine at position 832 to a glycine, have been shown to frequently appear and can suppress phenotypes associated with *dnaQ* mutants (1).

1. Slater SC, Lifshits MR, O'Donnell M, Maurer R (1994) *hoI*E, the gene coding for the theta subunit of DNA polymerase III of *Escherichia coli*: Characterization of a *hoI*E mutant and comparison with a *dnaQ* (epsilon-subunit) mutant. *J Bacteriol* 176(3):815–821.

**Table S1. *Escherichia coli* strains and plasmids used**

| Strain or plasmid | Genotype                                                                                                                                                                                                                                                                         | Source or Construction     |
|-------------------|----------------------------------------------------------------------------------------------------------------------------------------------------------------------------------------------------------------------------------------------------------------------------------|----------------------------|
| SR108             | $\lambda^-$ , <i>thyA</i> , <i>deo</i> , <i>IN(rrnD-rrnE)</i>                                                                                                                                                                                                                    | (1)                        |
| AB1157            | $\lambda^-$ , <i>thr</i> , <i>ara-14</i> , <i>leu</i> , ( <i>gpt-proA</i> )62, <i>lacY1</i> , <i>tsx-33</i> , <i>supE44</i> , <i>galK2</i> , <i>hisG4</i> , <i>rfdD1</i> , <i>mgl-51</i> , <i>rpsL</i> , <i>kdgK51</i> , <i>xyl-5</i> , <i>mtl-1</i> , <i>argE3</i> , <i>thi</i> | (2)                        |
| CRT266            | <i>dnaB266(ts)</i> , $\lambda^-$ , <i>thr</i> , <i>leu</i> , <i>met</i> , <i>thyA</i> , <i>deo</i> , <i>supE</i> , <i>tonA</i>                                                                                                                                                   | (3)                        |
| E486              | <i>dnaE486(ts)</i> , $\lambda^-$ , <i>thr</i> , <i>leu</i> , <i>met</i> , <i>thi</i> , <i>thyA</i> , <i>deo</i> , <i>lac</i> , <i>rpsL</i> , <i>tonA</i>                                                                                                                         | (4)                        |
| PC3               | <i>dnaG3(ts)</i> , $\lambda^-$ , <i>leu</i> , <i>thyA</i> , <i>deo</i> , <i>rpsL</i>                                                                                                                                                                                             | (5)                        |
| MS101             | <i>dnaN159(ts)</i> , $\lambda^-$ , <i>thr</i> , <i>araD</i> , ( <i>gpt-proA</i> )62, <i>lacY1</i> , <i>tsx-33</i> <i>supE</i> , <i>galK2</i> , <i>hisG4</i> , <i>rpsL</i> , <i>xyl-5</i> , <i>mtl-1</i> , <i>argE3</i> , <i>thi</i> , <i>sulA</i> , <i>tnaA300::Tn10</i>         | (6)                        |
| KH1366            | <i>dnaQ49(ts)</i> , $\lambda^-$ , <i>met</i> , ( <i>cod-lacI</i> ), <i>tsx-7</i> , <i>srl-8</i> , <i>relA</i> , <i>spoT</i>                                                                                                                                                      | (7)                        |
| AX727             | <i>dnaX2016(ts)</i> , $\lambda^-$ , <i>lac</i> , <i>rpsL</i> , <i>thi</i>                                                                                                                                                                                                        | (8)                        |
| CL756             | <i>dnaB266(ts)</i> , $\lambda^-$ , <i>thr</i> , <i>leu</i> , <i>met</i> , <i>thyA</i> , <i>deo</i> , <i>supE</i> , <i>tonA</i> <i>recF6206::tet<sup>R</sup></i>                                                                                                                  | (9)                        |
| CL069             | <i>dnaE486(ts)</i> , $\lambda^-$ , <i>thr</i> , <i>leu</i> , <i>met</i> , <i>thi</i> , <i>thyA</i> , <i>deo</i> , <i>lac</i> , <i>rpsL</i> , <i>tonA</i> <i>recF349</i> <i>tna300::Tn10</i>                                                                                      | E486 × P1 from HL 919 (10) |
| CL583             | $\lambda^-$ , <i>thyA</i> , <i>deo</i> , <i>IN(rrnD-rrnE)</i> , <i>recF6206::tet<sup>R</sup></i>                                                                                                                                                                                 | (11)                       |
| Plasmid pBR322    |                                                                                                                                                                                                                                                                                  | (12)                       |

- Mellon I, Hanawalt PC (1989) Induction of the *Escherichia coli* lactose operon selectively increases repair of its transcribed DNA strand. *Nature* 342(6245):95–98.
- Bachmann BJ (1972) Pedigrees of some mutant strains of *Escherichia coli* K-12. *Bacteriol Rev* 36(4):525–557.
- Kohiyama M, Cousin D, Ryter A, Jacob F (1966) [Thermosensitive mutants of *Escherichia coli* K 12. I. Isolation and rapid characterization]. *Ann Inst Pasteur (Paris)* 110(4):465–486.
- Wechsler JA, Gross JD (1971) *Escherichia coli* mutants temperature-sensitive for DNA synthesis. *Mol Gen Genet* 113(3):273–284.
- Carl PL (1970) *Escherichia coli* mutants with temperature-sensitive synthesis of DNA. *Mol Gen Genet* 109(2):107–122.
- Sutton MD (2004) The *Escherichia coli* *dnaN159* mutant displays altered DNA polymerase usage and chronic SOS induction. *J Bacteriol* 186(20):6738–6748.
- Horiuchi T, Maki H, Sekiguchi M (1978) A new conditional lethal mutator (*dnaQ49*) in *Escherichia coli* K12. *Mol Gen Genet* 163(3):277–283.
- Filip CC, Allen JS, Gustafson RA, Allen RG, Walker JR (1974) Bacterial cell division regulation: Characterization of the *dnaH* locus of *Escherichia coli*. *J Bacteriol* 119(2):443–449.
- Belle JJ, Casey A, Courcelle CT, Courcelle J (2007) Inactivation of the DnaB helicase leads to the collapse and degradation of the replication fork: A comparison to UV-induced arrest. *J Bacteriol* 189(15):5452–5462.
- Courcelle J, Carswell-Crumpton C, Hanawalt PC (1997) *recF* and *recR* are required for the resumption of replication at DNA replication forks in *Escherichia coli*. *Proc Natl Acad Sci USA* 94(8):3714–3719.
- Courcelle J, Donaldson JR, Chow KH, Courcelle CT (2003) DNA damage-induced replication fork regression and processing in *Escherichia coli*. *Science* 299(5609):1064–1067.
- Bolivar F, et al. (1977) Construction and characterization of new cloning vehicles. II. A multipurpose cloning system. *Gene* 2(2):95–113.
